# Supplementary material
Source: PubMed Central journal article supplement (PMC8785994)
Supplement: 6983_2_supp_65571_qmzrpy.pdf [file 6983_2_supp_65571_qmzrpy.pdf]

## **Supplemental Appendix**

This appendix has been provided by the authors to give readers additional information about their work.

Supplement to: Agarwal R, Rossignol P, Budden J, et al. Patiromer and spironolactone in resistant hypertension and advanced CKD: analysis of the randomized AMBER trial.

Supplementary information is available on Kidney360's website.

## Table of Contents

|                                                                                                                                                              |    |
|--------------------------------------------------------------------------------------------------------------------------------------------------------------|----|
| Supplemental Appendix A. Adverse events indicative of worsening renal function.....                                                                          | 2  |
| Supplemental Appendix B. Serum calcium and magnesium levels above or below prespecified thresholds during the study.....                                     | 4  |
| Supplemental Table 1. Reasons for early discontinuation of study treatment by eGFR subgroup and treatment.....                                               | 5  |
| Supplemental Table 2. Cumulative spironolactone dose over 12 weeks by eGFR subgroup and treatment. ....                                                      | 6  |
| Supplemental Table 3. Prespecified laboratory values of interest by eGFR subgroup and treatment.....                                                         | 7  |
| Supplemental Table 4. eGFR and urine albumin/creatinine ratio change from baseline at week 12.....                                                           | 8  |
| Supplemental Table 5. Serum calcium and magnesium levels results over time and change from baseline. ....                                                    | 9  |
| Supplemental Figure 1. Patient disposition by eGFR subgroups. ....                                                                                           | 10 |
| Supplemental Figure 2. Mean (SE) central laboratory serum potassium during active treatment in the A) eGFR 25–<30 subgroup, and B) eGFR 30–45 subgroup. .... | 11 |

## **Supplemental Appendix A. Adverse events indicative of worsening renal function.**

In the estimated glomerular filtration rate (eGFR) 25–<30 subgroup, rates of adverse events (AEs) indicative of worsening kidney function were consistent with those in the overall AMBER population. These included AEs of renal failure (1.5% in the eGFR 25–<30 subgroup and 1.7% in the overall population), renal impairment (9.1% in the eGFR 25–<30 subgroup and 7.8% overall), chronic kidney disease (CKD) (0 in the eGFR 25–<30 subgroup and 0.7% overall), and nephropathy (0 in the eGFR 25–<30 subgroup and 0.3% overall).

AEs indicative of worsening kidney function led to spironolactone dose reduction in 1 placebo-treated patient and 1 patiromer-treated patient in the eGFR 25–<30 subgroup and 5 placebo-treated patients and 9 patiromer-treated patients in the eGFR 30–45 subgroup. AEs indicative of worsening kidney function led to early discontinuation of spironolactone in none of placebo-treated patients and 1 patiromer-treated patient in the eGFR 25–<30 subgroup and 3 placebo-treated patients and 1 patiromer-treated patient in the eGFR 30–45 subgroup.

## Supplemental Appendix B. Serum calcium and magnesium levels above or below prespecified thresholds during the study.

In patients in the eGFR 25–<30 subgroup, on-study serum calcium values >10.5 mg/dL (the upper limit of normal [ULN]) were observed in 2 patients in the placebo group (**Supplemental Table 3**). Both of these patients had screening or baseline serum calcium >10.5 mg/dL. In patients in the eGFR 30–45 subgroup, on-study serum calcium >10.5 mg/dL occurred in 3 patients in the placebo group (2 of 3 with screening/baseline serum calcium >10.5 mg/dL), and in 4 patients on patiromer (2 with baseline serum calcium >ULN); 1 patient in patiromer group also had an AE of hypercalcemia. This patient's serum calcium was 11.7 mg/dL at the time the AE was reported, and the AE resolved without a change in dosing of patiromer or spironolactone. Serum calcium returned to the normal range by the follow-up visit in all 4 patiromer-treated patients who had on-study calcium above the ULN.

Four patients (1 in the placebo group and 3 in the patiromer group) in the eGFR 30–45 subgroup had on study serum magnesium <1.4 mg/dL (none in the eGFR 25–<30 subgroup and none with serum magnesium <1.2 mg/dL; **Supplemental Table 3**). In two of these patients, serum magnesium was below the lower limit of normal (LLN; 1.8 mg/dL) at baseline. None of these patients had cardiac arrhythmias temporally associated with low magnesium levels, neuromuscular abnormalities, or serum potassium below the LLN (3.5 mEq/L). One patient in the patiromer group had serum magnesium in the normal range at baseline, and serum magnesium had returned to the normal range at the follow-up visit. Two patients on patiromer had AEs of hypomagnesemia. One had a laboratory serum magnesium value equal to 1.4 mg/dL at the time of the AE (1.7 mg/dL at baseline, 1.8 mg/dL at follow-up). The other patient had 3 separate AEs of hypomagnesemia, with lab values of 1.7 mg/dL at the time of each AE (2.0 mg/dL at baseline, 1.7 mg/dL at follow-up).

**Supplemental Table 1. Reasons for early discontinuation of study treatment by eGFR subgroup and treatment.**

|                                                                                           | eGFR 25–<30 Subgroup |                    |                                  | eGFR 30–45 Subgroup |                     |                                   |
|-------------------------------------------------------------------------------------------|----------------------|--------------------|----------------------------------|---------------------|---------------------|-----------------------------------|
|                                                                                           | SPIRO + PBO (n=34)   | SPIRO + PAT (n=32) | Treatment Groups Combined (n=66) | SPIRO + PBO (n=114) | SPIRO + PAT (n=115) | Treatment Groups Combined (n=229) |
| Discontinued early from study treatment                                                   | 15 (44)              | 5 (16)             | 20 (30)                          | 35 (31)             | 16 (14)             | 51 (22)                           |
| Met 1 of 3 protocol-specified withdrawal criteria* for high serum K <sup>+</sup> :        |                      |                    |                                  |                     |                     |                                   |
| 1) Patiromer/placebo dose = max, confirmed* K <sup>+</sup> ≥5.5 and <6.0                  | 4 (12)               | 1 (3)              | 5 (8)                            | 17 (15)             | 2 (2)               | 19 (8)                            |
| 2) Patiromer/placebo dose increased by 8.4 g/day, confirmed† K <sup>+</sup> ≥5.5 and <6.0 | 3 (9)                | 0                  | 3 (5)                            | 4 (4)               | 6 (5)               | 10 (4)                            |
| 3) Confirmed* K <sup>+</sup> ≥6.0                                                         | 2 (6)                | 1 (3)              | 3 (5)                            | 4 (4)               | 0                   | 4 (2)                             |
| Had protocol-defined symptomatic hypotension‡                                             | 1 (3)                | 2 (6)              | 3 (5)                            | 1 (1)               | 2 (2)               | 3 (1)                             |
| Had protocol-defined decline in eGFR§                                                     | 1 (3)                | 1 (3)              | 2 (3)                            | 3 (3)               | 2 (2)               | 5 (2)                             |
| Other                                                                                     | 5 (15)               | 0                  | 5 (8)                            | 6 (5)               | 6 (5)               | 12 (5)                            |
| Adverse event                                                                             | 1 (3)                | 0                  | 1 (2)                            | 4 (4)               | 3 (3)               | 7 (3)                             |
| Patient withdrawal                                                                        | 3 (9)                | 0                  | 3 (5)                            | 2 (2)               | 1 (1)               | 3 (1)                             |
| Low serum K <sup>+</sup>                                                                  | 1 (3)                | 0                  | 1 (2)                            | 0                   | 1 (1)               | 1 (0.4)                           |
| Investigator decision                                                                     | 0                    | 0                  | 0                                | 0                   | 1 (1)               | 1 (0.4)                           |

Data are n (%). Note: patients could have more than one reason for discontinuing early from study treatment.

AOBP, automated office blood pressure; eGFR, estimated glomerular filtration rate; K<sup>+</sup>, potassium; PAT, patiromer; PBO, placebo; SPIRO, spironolactone.

\*Repeat K<sup>+</sup> measurement (taken within 1 day) that confirms the initial measurement.

†Repeat K<sup>+</sup> measurement (taken within 3 days after the 8.4 g/day dose increase) that confirms the initial measurement.

‡Systolic AOBP <100 mmHg, or symptoms of hypotension and systolic AOBP <120 mmHg.

§eGFR decrease of 30–50% or eGFR decrease of >50% from baseline that did not return to ≤30% of baseline within 4 weeks.

**Supplemental Table 2. Cumulative spironolactone dose over 12 weeks by eGFR subgroup and treatment.**

|                                                                                           | <b>eGFR 25–&lt;30 Subgroup</b>      |                                      | <b>eGFR 30–45 Subgroup</b>           |                                       |
|-------------------------------------------------------------------------------------------|-------------------------------------|--------------------------------------|--------------------------------------|---------------------------------------|
|                                                                                           | Spirolactone +<br>Placebo<br>(n=34) | Spirolactone +<br>Patiomer<br>(n=32) | Spirolactone +<br>Placebo<br>(n=114) | Spirolactone +<br>Patiomer<br>(n=115) |
| Cumulative dose of spironolactone, mean (SE) mg*                                          | 2419.1 (231.0)                      | 3071.1 (146.1)                       | 2628.9 (103.8)                       | 2906.5 (94.1)                         |
| Difference between treatment groups (patiomer group minus placebo group), LS mean (SE) mg | 732.4 (274.3)                       |                                      | 273.8 (139.7)                        |                                       |

eGFR, estimated glomerular filtration rate; LS, least squares; SE, standard error.

\*Cumulative dose of spironolactone = sum of actual doses taken.

**Supplemental Table 3. Prespecified laboratory values of interest by eGFR subgroup and treatment.**

|                                                                                       | eGFR 25–<30 Subgroup                  |                                         | eGFR 30–45 Subgroup                    |                                          |
|---------------------------------------------------------------------------------------|---------------------------------------|-----------------------------------------|----------------------------------------|------------------------------------------|
|                                                                                       | Spironolactone +<br>Placebo<br>(n=34) | Spironolactone +<br>Patiromer<br>(n=32) | Spironolactone +<br>Placebo<br>(n=114) | Spironolactone +<br>Patiromer<br>(n=115) |
| Serum K <sup>+</sup> <3.8 mEq/L                                                       |                                       |                                         |                                        |                                          |
| At baseline                                                                           | 0                                     | 0                                       | 1                                      | 0                                        |
| At any post-baseline through week 12 Visit                                            | 1                                     | 2                                       | 3                                      | 4                                        |
| Serum K <sup>+</sup> <3.5 mEq/L                                                       |                                       |                                         |                                        |                                          |
| At baseline                                                                           | 0                                     | 0                                       | 0                                      | 0                                        |
| At any post-baseline through week 12 Visit                                            | 0                                     | 0                                       | 0                                      | 1                                        |
| Serum magnesium in the following<br>range at baseline:                                |                                       |                                         |                                        |                                          |
| <1.4 mg/dL                                                                            | 0                                     | 0                                       | 0                                      | 1                                        |
| <1.2 mg/dL                                                                            | 0                                     | 0                                       | 0                                      | 0                                        |
| Serum magnesium in the following<br>range at any post-baseline through week 12 Visit: |                                       |                                         |                                        |                                          |
| <1.4 mg/dL                                                                            | 0                                     | 0                                       | 1                                      | 3                                        |
| <1.2 mg/dL                                                                            | 0                                     | 0                                       | 0                                      | 0                                        |
| Serum magnesium in the following<br>range at any time while on study medication:      |                                       |                                         |                                        |                                          |
| <1.4 mg/dL                                                                            | 0                                     | 0                                       | 1*                                     | 3*                                       |
| <1.2 mg/dL                                                                            | 0                                     | 0                                       | 0*                                     | 0*                                       |
| Serum calcium <8.5 mg/dL:                                                             |                                       |                                         |                                        |                                          |
| At baseline                                                                           | 3                                     | 5                                       | 2                                      | 2                                        |
| At any post-baseline through week 12 Visit                                            | 8                                     | 6                                       | 13                                     | 14                                       |
| While on study medication                                                             | 7                                     | 6                                       | 13*                                    | 12*                                      |
| Serum calcium >10.5 mg/dL:                                                            |                                       |                                         |                                        |                                          |
| At baseline                                                                           | 3                                     | 0                                       | 0                                      | 2                                        |
| At any post-baseline through week 12 Visit                                            | 2                                     | 0                                       | 3                                      | 4                                        |
| While on study medication                                                             | 2                                     | 0                                       | 3*                                     | 4*                                       |

eGFR, estimated glomerular filtration rate; K<sup>+</sup> potassium.

\*n=113 for PBO and n=114 for PAT (some patients were missing post-baseline data).

**Supplemental Table 4. eGFR and urine albumin/creatinine ratio change from baseline at week 12.**

|                                                                                | <b>eGFR 25–&lt;30 Subgroup</b>        |                                         | <b>eGFR 30–45 Subgroup</b>             |                                          |
|--------------------------------------------------------------------------------|---------------------------------------|-----------------------------------------|----------------------------------------|------------------------------------------|
|                                                                                | Spironolactone +<br>Placebo<br>(n=34) | Spironolactone +<br>Patiromer<br>(n=32) | Spironolactone +<br>Placebo<br>(n=114) | Spironolactone +<br>Patiromer<br>(n=115) |
| eGFR change from baseline at week 12, mean (SE) mL/min/1.73m <sup>2</sup>      | 1.3 (1.2)                             | 1.1 (1.1)                               | –3.1 (0.7)                             | –2.1 (0.7)                               |
| Urine albumin/creatinine ratio change from baseline at week 12, mean (SE) mg/g | –165 (70)                             | –34 (73)                                | –14 (42)                               | –26 (30)                                 |

eGFR, estimated glomerular filtration rate; GFR, glomerular filtration rate; SE, standard error.



**Supplemental Table 5. Serum calcium and magnesium levels results over time and change from baseline.**

|                                   | eGFR 25–<30 Subgroup                |                                       | eGFR 30–45 Subgroup                  |                                        |
|-----------------------------------|-------------------------------------|---------------------------------------|--------------------------------------|----------------------------------------|
|                                   | Spirolactone +<br>Placebo<br>(n=34) | Spirolactone +<br>Patiromer<br>(n=32) | Spirolactone +<br>Placebo<br>(n=114) | Spirolactone +<br>Patiromer<br>(n=115) |
| Magnesium, mean (SE) mg/dL        |                                     |                                       |                                      |                                        |
| Baseline                          | 2.24 (0.05)                         | 2.10 (0.05)                           | 2.06 (0.02)                          | 2.11 (0.03)                            |
| Week 1                            | 2.28 (0.05)                         | 2.08 (0.05)                           | 2.07 (0.02)                          | 2.06 (0.03)                            |
| Week 2                            | 2.25 (0.04)                         | 2.09 (0.06)                           | 2.11 (0.02)                          | 2.04 (0.03)                            |
| Week 3                            | 2.18 (0.04)                         | 2.13 (0.05)                           | 2.12 (0.03)                          | 2.11 (0.03)                            |
| Week 4                            | 2.17 (0.04)                         | 2.04 (0.05)                           | 2.08 (0.02)                          | 2.05 (0.03)                            |
| Week 6                            | 2.18 (0.04)                         | 2.06 (0.05)                           | 2.10 (0.02)                          | 2.05 (0.03)                            |
| Week 8                            | 2.18 (0.04)                         | 2.11 (0.05)                           | 2.08 (0.03)                          | 2.05 (0.03)                            |
| Week 10                           | 2.22 (0.04)                         | 2.14 (0.06)                           | 2.08 (0.03)                          | 2.06 (0.03)                            |
| Week 12                           | 2.21 (0.04)                         | 2.09 (0.05)                           | 2.08 (0.02)                          | 2.02 (0.03)                            |
| Change from baseline to week 12   | −0.06 (0.04)                        | −0.01 (0.04)                          | 0.01 (0.02)                          | −0.08 (0.02)                           |
| Follow-up                         | 2.24 (0.05)                         | 2.20 (0.06)                           | 2.13 (0.02)                          | 2.14 (0.03)                            |
| Change from baseline to follow-up | −0.03 (0.04)                        | 0.13 (0.04)                           | 0.06 (0.02)                          | 0.03 (0.02)                            |
| Calcium, mean (SE) mg/dL          |                                     |                                       |                                      |                                        |
| Baseline                          | 9.34 (0.15)                         | 9.03 (0.14)                           | 9.26 (0.05)                          | 9.33 (0.04)                            |
| Week 1                            | 9.35 (0.16)                         | 9.10 (0.13)                           | 9.33 (0.05)                          | 9.36 (0.04)                            |
| Week 2                            | 9.49 (0.15)                         | 9.23 (0.10)                           | 9.32 (0.05)                          | 9.41 (0.04)                            |
| Week 3                            | 9.31 (0.16)                         | 9.18 (0.10)                           | 9.28 (0.05)                          | 9.31 (0.05)                            |
| Week 4                            | 9.34 (0.15)                         | 9.12 (0.11)                           | 9.29 (0.05)                          | 9.34 (0.04)                            |
| Week 6                            | 9.26 (0.12)                         | 9.16 (0.11)                           | 9.31 (0.05)                          | 9.35 (0.04)                            |
| Week 8                            | 9.20 (0.15)                         | 9.11 (0.10)                           | 9.23 (0.05)                          | 9.29 (0.04)                            |
| Week 10                           | 9.23 (0.14)                         | 9.04 (0.10)                           | 9.28 (0.05)                          | 9.30 (0.04)                            |
| Week 12                           | 9.14 (0.17)                         | 9.08 (0.10)                           | 9.24 (0.05)                          | 9.26 (0.04)                            |
| Change from baseline to week 12   | −0.16 (0.09)                        | 0.06 (0.07)                           | −0.01 (0.04)                         | −0.07 (0.04)                           |
| Follow-up                         | 9.11 (0.16)                         | 9.04 (0.11)                           | 9.18 (0.06)                          | 9.23 (0.04)                            |
| Change from baseline to follow-up | −0.17 (0.08)                        | 0.04 (0.08)                           | −0.07 (0.04)                         | −0.08 (0.04)                           |

eGFR, estimated glomerular filtration rate; SE, standard error.

**Supplemental Figure 1. Patient disposition by eGFR subgroups.**

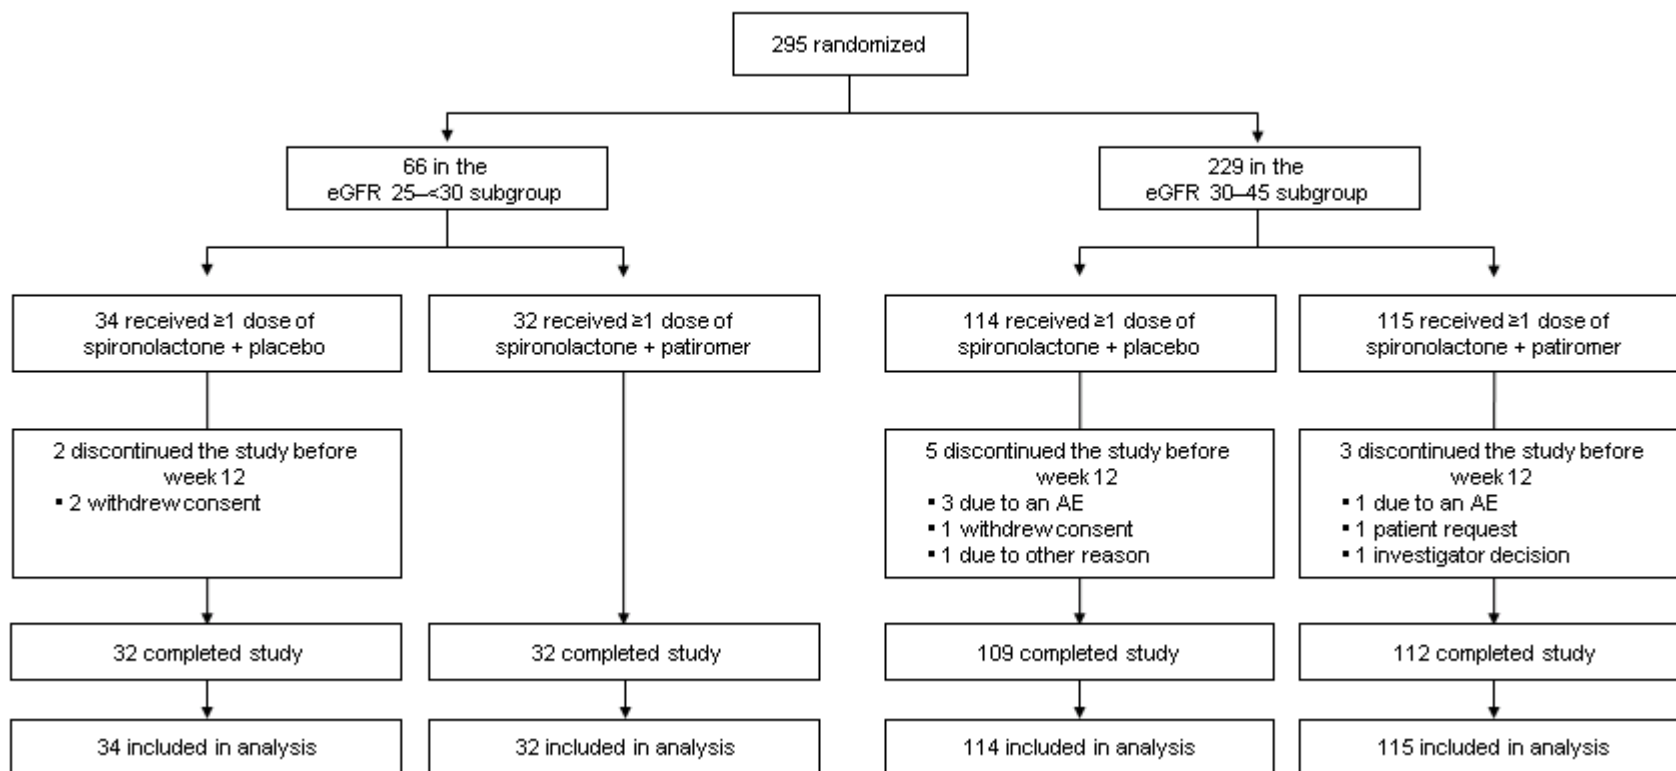

AE, adverse event; eGFR, estimated glomerular filtration rate.

Supplemental Figure 2. Mean (SE) central laboratory serum potassium during active treatment in the A) eGFR 25–<30 subgroup, and B) eGFR 30–45 subgroup.

A)

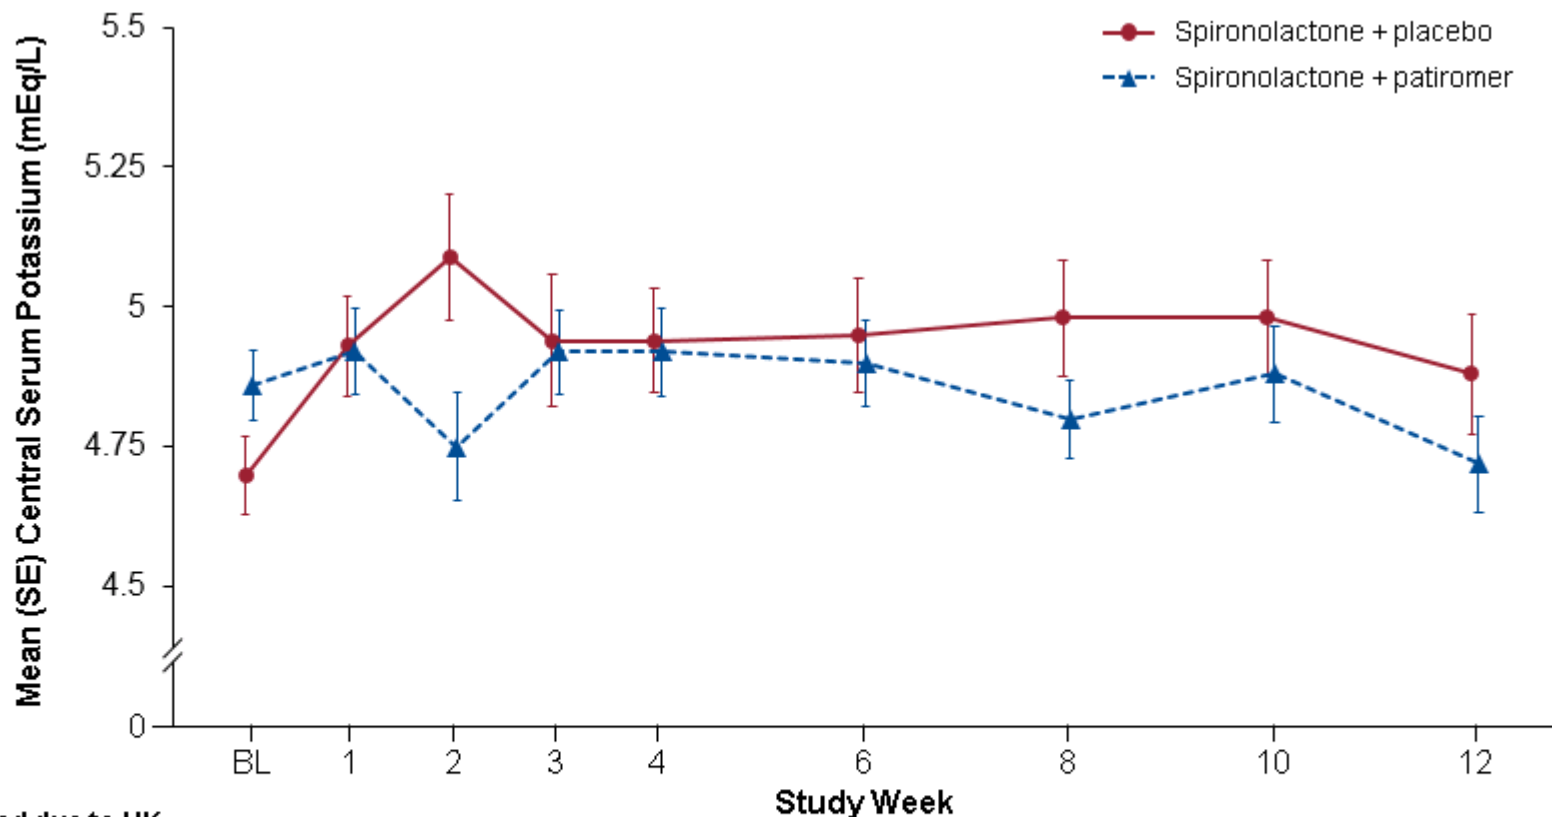

**Discontinued due to HK**

Spironolactone + placebo

Spironolactone + patiromer

|   |   |   |   |   |   |   |   |   |
|---|---|---|---|---|---|---|---|---|
| 0 | 0 | 2 | 1 | 1 | 0 | 2 | 2 | 1 |
| 0 | 0 | 0 | 0 | 0 | 0 | 0 | 2 | 0 |

**Observed patients**

Spironolactone + placebo

Spironolactone + patiromer

|    |    |    |    |    |    |    |    |    |
|----|----|----|----|----|----|----|----|----|
| 34 | 34 | 34 | 32 | 32 | 32 | 32 | 31 | 32 |
| 32 | 32 | 32 | 32 | 32 | 32 | 32 | 32 | 32 |

B)

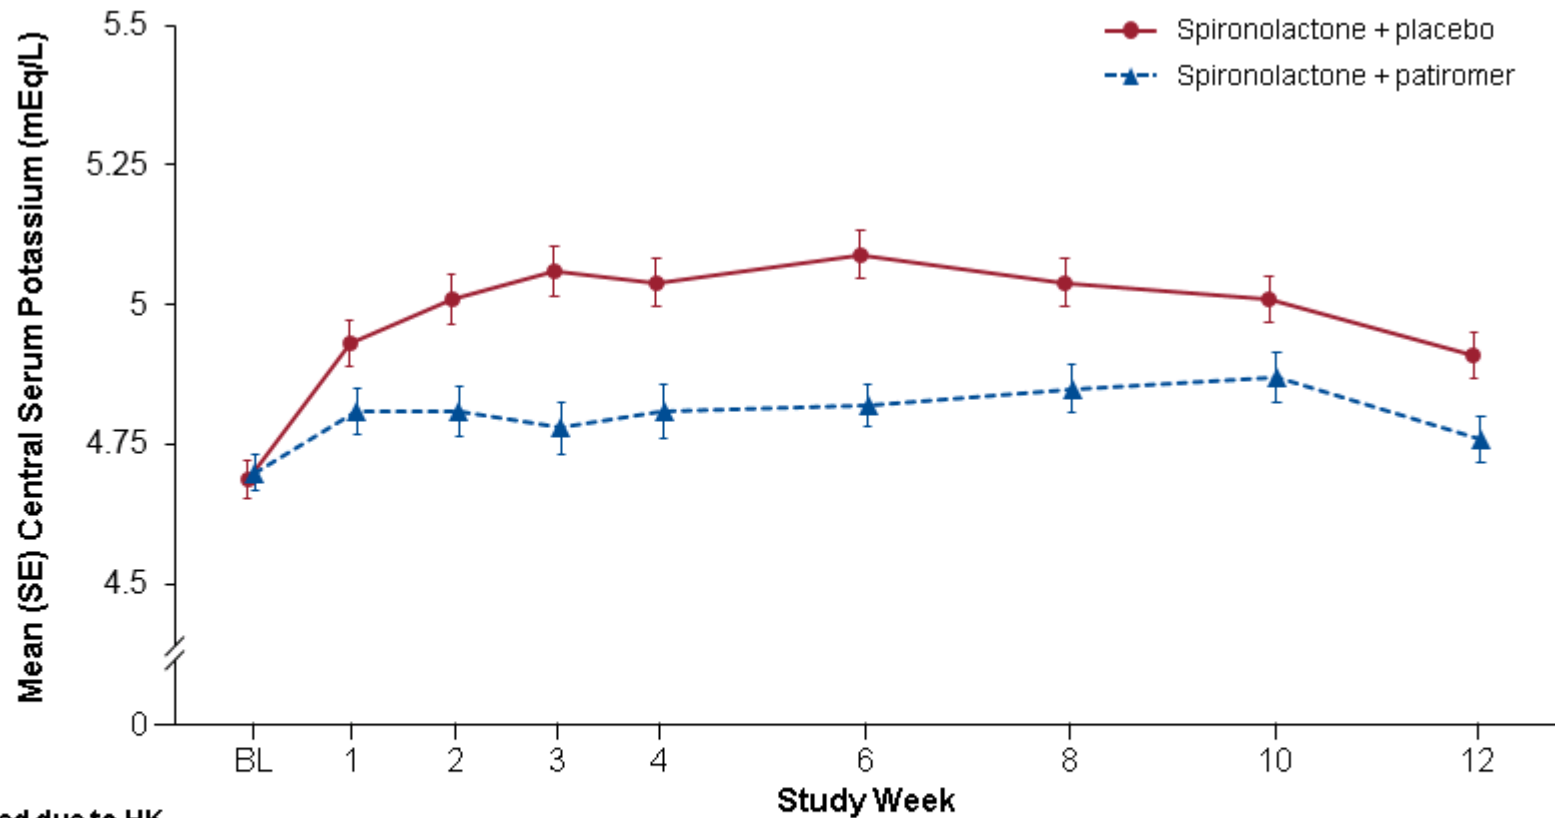

**Discontinued due to HK**

|                             |   |   |   |   |   |   |   |   |   |
|-----------------------------|---|---|---|---|---|---|---|---|---|
| Spiroonolactone + placebo   | 0 | 1 | 1 | 3 | 3 | 2 | 8 | 3 | 4 |
| Spiroonolactone + patiromer | 0 | 0 | 2 | 1 | 1 | 1 | 0 | 2 | 1 |

**Observed patients**

|                             |     |     |     |     |     |     |     |     |     |
|-----------------------------|-----|-----|-----|-----|-----|-----|-----|-----|-----|
| Spiroonolactone + placebo   | 114 | 112 | 113 | 113 | 113 | 112 | 110 | 106 | 108 |
| Spiroonolactone + patiromer | 115 | 114 | 115 | 114 | 113 | 112 | 112 | 110 | 112 |

eGFR, estimated glomerular filtration rate; HK, hyperkalemia; SE, standard error.

Observed patients = Number of patients who have non-missing values at a study visit.

Discontinued patients = Number of patients who discontinued study treatment early for hyperkalemia at the study visit.
